# Supplementary material for: The Effect of Carbamazepine on Performance, Carcass Value, Hematological and Biochemical Blood Parameters, and Detection of Carbamazepine and Its Metabolites in Tissues, Internal Organs, and Body Fluids in Growing Rabbits
Source: MDPI journal article supplement (doi:10.3390/ani13122041), 2023-06-20
Supplement: s1 [file s1]

**Table S1.** List of analytes with MRM <sup>1</sup> transitions and parameters.

| Analyte                                             | Q1 <sup>2</sup> (m·z <sup>-1</sup> ) | Q3 <sup>3</sup> (m·z <sup>-1</sup> ) | RT <sup>4</sup> (min) |
|-----------------------------------------------------|--------------------------------------|--------------------------------------|-----------------------|
| CBZ-1 <sup>5</sup>                                  | 237.06                               | 194                                  | 2.12                  |
| CBZ-2 <sup>6</sup>                                  | 237.06                               | 165                                  | 2.12                  |
| CBZ-epoxide-1                                       | 253.045                              | 179.9                                | 1.43                  |
| CBZ-epoxide-2                                       | 253.045                              | 236.1                                | 1.43                  |
| <i>trans</i> -CBZ diol-1                            | 271.04                               | 210                                  | 1.31                  |
| <i>trans</i> -CBZ diol-2                            | 271.04                               | 180.1                                | 1.31                  |
| <sup>13</sup> C <sub>6</sub> -CBZ-ISTD <sup>7</sup> | 243.098                              | 200                                  | 2.11                  |
| CBZ-epoxide-d <sub>10</sub> -ISTD <sup>8</sup>      | 263.099                              | 246.1                                | 1.41                  |

<sup>1</sup> MRM, Multiple Reaction Monitoring; <sup>2</sup> Q1, M + H<sup>+</sup>; <sup>3</sup> Q3, fragment ion; <sup>4</sup> RT, retention time (min);

<sup>5</sup> CBZ-1, carbamazepine-1 quantifier ion; <sup>6</sup> CBZ-2, carbamazepine-2 quantifier ion; <sup>7</sup> <sup>13</sup>C<sub>6</sub>-CBZ-ISTD, <sup>13</sup>C<sub>6</sub>-CBZ internal standards; <sup>8</sup> CBZ-epoxide-d<sub>10</sub>-ISTD, CBZ-epoxide-d<sub>10</sub> internal standards.

**Table S2.** Ion source parameters—Electrospray ionization conducted in positive mode.

| Parameter        | Setting |
|------------------|---------|
| Curtain Gas      | 35 psi  |
| Collision Gas    | Medium  |
| IonSpray Voltage | 5500 V  |
| Temperature      | 550 °C  |
| Ion Source Gas 1 | 40 psi  |
| Ion Source Gas 2 | 50 psi  |

**Table S3.** Limit of quantification (LOQ) results based on the extraction method validation.

| Analysed Group    | Sampling Weight/Volume | CBZ <sup>1</sup> | CBZ-E <sup>2</sup> | CBZ-diol <sup>3</sup> |
|-------------------|------------------------|------------------|--------------------|-----------------------|
| Urine             | 0.10 mL                | 1 <sup>4</sup>   | 0.5                | 0.5                   |
| Feces             | 0.10 g                 | 10               | 0.5                | 0.5                   |
| Content of Caecum | 0.10 g                 | 1                | 0.5                | 10                    |
| Serum/Plasma      | 0.10 mL                | 10               | 0.5                | n.v. <sup>5</sup>     |
| Liver             | 0.10 g                 | 0.5              | 0.5                | 1                     |
| Kidney            | 1.00 g                 | 25               | 1                  | 1                     |
| Meat of loin      | 1.00 g                 | 0.5              | 0.5                | 1                     |
| Meat of thigh     | 0.10 g                 | 0.5              | 0.5                | 10                    |
| Spleen            | 0.10 g                 | 1                | 1                  | n.v.                  |

<sup>1</sup> CBZ, carbamazepine; <sup>2</sup> CBZ-E, CBZ-10,11-epoxide; <sup>3</sup> CBZ-diol, *trans*-10,11-dihydro-10,11-dihydroxy-CBZ; <sup>4</sup> Limit of quantification at ng·g<sup>-1</sup> (ppb); <sup>5</sup> n.v., not validated.
